# Supplementary material for: Severe postpartum hemorrhage and the risk of adverse maternal outcome: A comparative analysis of two population-based studies in France and the Netherlands
Source: PubMed Central journal article supplement (PMC10907197; doi:10.1016/j.pmedr.2024.102665), 2024-02-23
Supplement: mmc3.pdf [file mmc3.pdf]

**Figure S1. Flowchart of patient inclusion from the French and the Dutch source population according to a harmonized definition of severe PPH.**

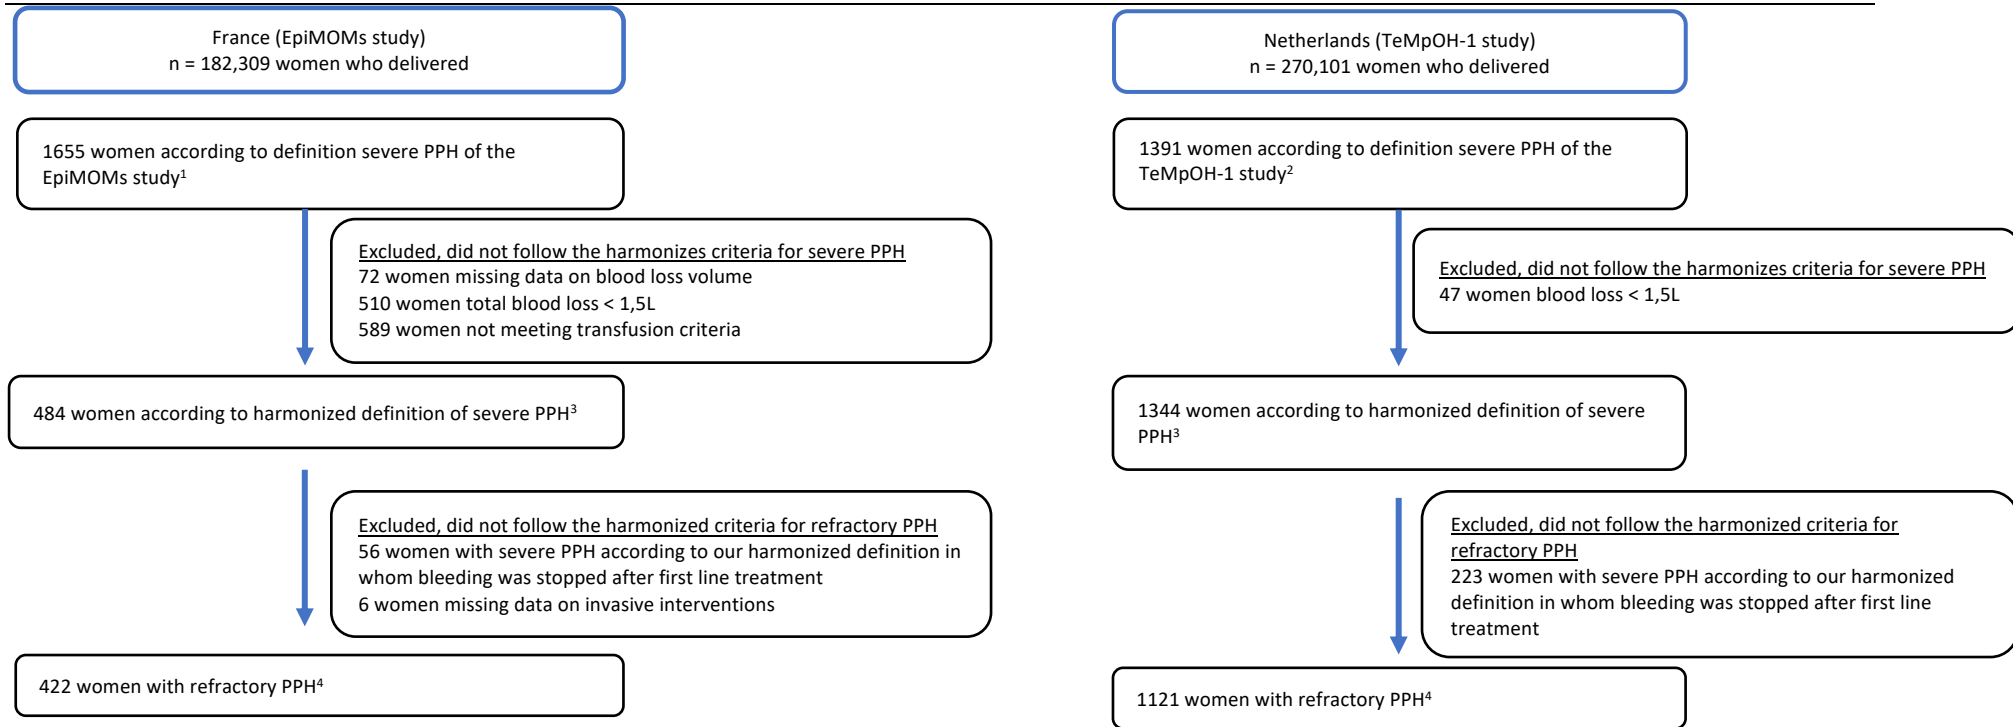

**Definitions used:**

<sup>1</sup>**TeMpOH-1 definition severe PPH:** women who received either  $\geq 4$  units of RBC or a multicomponent blood transfusion within 24 h following birth because of postpartum hemorrhage exceeding 1000 mL

<sup>2</sup>**EpiMOMs definition severe PPH:** blood loss  $\geq 1500$  ml; and/or hemorrhage with Blood transfusion  $\geq 4$  RBC or Arterial embolization or Vascular ligation or Compressive uterine suture or Emergency peripartum hysterectomy or any organ dysfunction (according to EpiMOMs definition)

<sup>3</sup>**Harmonized definition severe PPH:** blood loss  $\geq 1500$  ml AND transfusion  $\geq 4$  units of RBC OR a multicomponent blood transfusion within 24 h following birth

<sup>4</sup>**Refractory PPH:** severe PPH according to our harmonized definition, and which was refractory to first-line management (uterine massage, exploration of the uterine cavity, assessment of the genital tract and administration of oxytocin)

PPH= postpartum hemorrhage, L=liters, RBC=red blood cells
